# Supplementary material
Source: Springer Nature journal article supplement (https://www.springermedizin.de/resource/supplementary/12916_2010_287_MOESM1_ESM.pdf/9599580)

**Overall sample**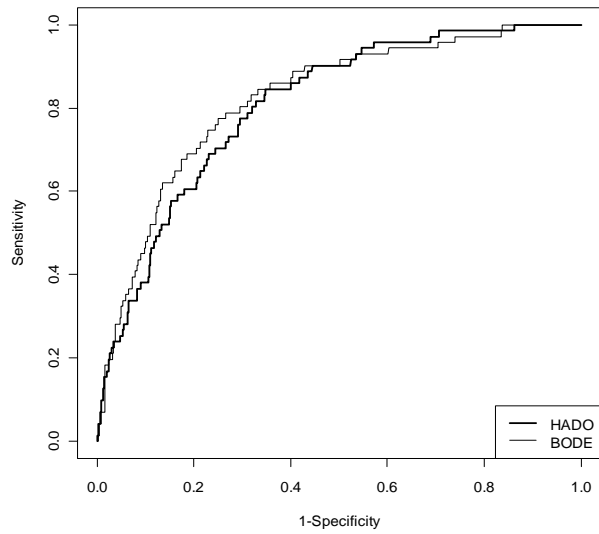**FEV < 50%**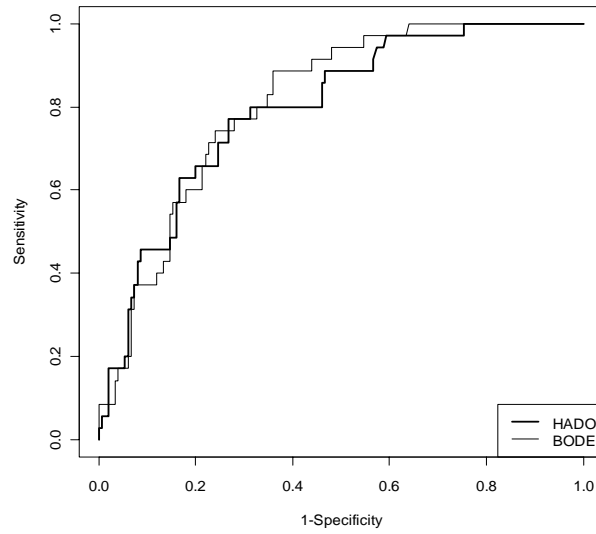**FEV >= 50%**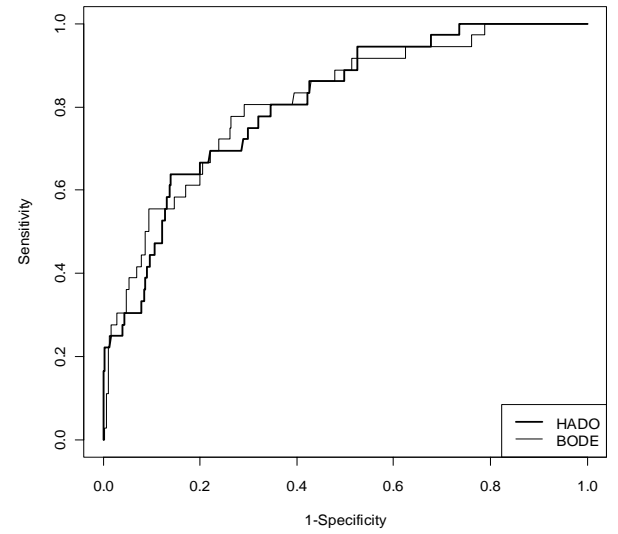**b) respiratory mortality.****Overall sample**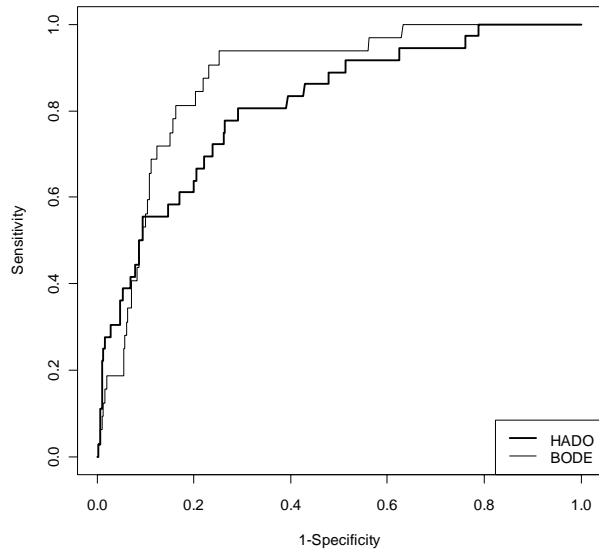**FEV < 50%**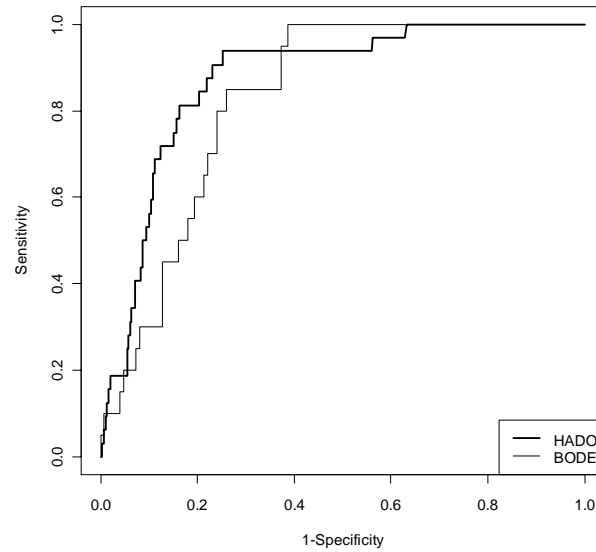**FEV >= 50%**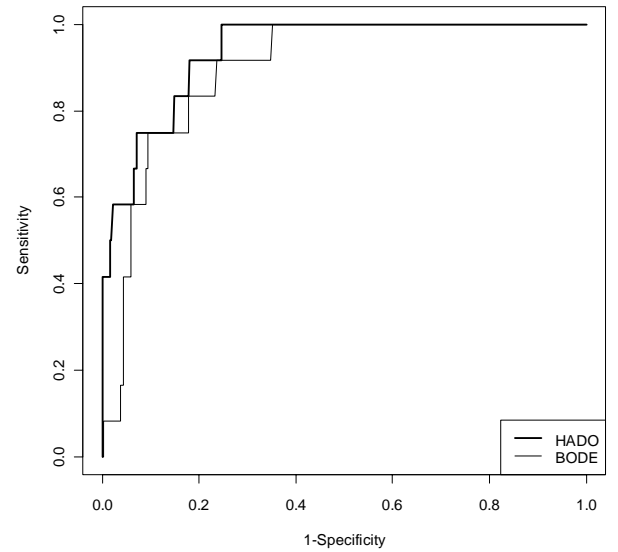

Supplement: MOESM1 [file 9599580]
